# Supplementary material for: Nephron mass determines the excretion rate of urinary extracellular vesicles
Source: PubMed Central journal article supplement (PMC8783354; doi:10.1002/jev2.12181), 2022-01-22
Supplement: JEV2-11-e12181-s002.pdf [file JEV2-11-e12181-s002.pdf]

## Supplemental Material

# **Nephron mass determines the excretion rate of urinary extracellular vesicles**

Charles J. Blijdorp MD, Thomas A. Hartjes MSc, Dominique M. Bovée MD,

Ricardo P.J. Budde MD, PhD, Jacqueline van de Wetering MD, PhD,

Joost G.J. Hoenderop PhD, Martin E. van Royen PhD, Robert Zietse MD, PhD,

David Severs MD, Ewout J. Hoorn MD, PhD

### **Table of content:**

|           |                                                                           |
|-----------|---------------------------------------------------------------------------|
| Table S1  | - Antibodies                                                              |
| Table S2  | - Comparison of baseline characteristics in female and male kidney donors |
| Table S3  | - Patient characteristics nephrostomy drain study                         |
| Table S4  | - Characteristics urine samples from nephrostomy drain and bladder        |
| Figure S1 | - Bland-Altman calculated spot vs. 24-hour uEV excretion                  |
| Figure S2 | - Full immunoblots                                                        |

**Table S1.** Antibodies

| Techniques        | Antibody      | Type      | Species | Concentration   | Source          | Cat#/clone |
|-------------------|---------------|-----------|---------|-----------------|-----------------|------------|
| <b>EVQuant</b>    | CD9 alexa-647 | Primary   | Mouse   | 1:25            | Thermo SC       | MA5-18154  |
| <b>CD9-TR-FIA</b> | CD9-biotin    | Capture   | Mouse   | 1:500           | Bioscience      | SN4 C3-3A2 |
|                   | CD9-Europium  | Primary   | Mouse   | 0.25ng/ $\mu$ L | CellGS          | CGS12A     |
| <b>Immunoblot</b> | WT1           | Primary   | Mouse   | 1:1000          | Ventana         | 6F-H2      |
|                   | CD9           | Primary   | Mouse   | 1:500           | Bioscience      | MAB1880    |
|                   | TSG101        | Primary   | Mouse   | 1:333           | Abcam           | ab83       |
|                   | Cubilin       | Primary   | Rabbit  | 1:12,000        | Dr. Christensen | -          |
|                   | NHE3          | Primary   | Rabbit  | 1:1000          | Stressmarq      | 7644       |
|                   | NaPi-IIa      | Primary   | Rabbit  | 1:500           | Abcam           | Ab83       |
|                   | NKCC2         | Primary   | Rabbit  | 1:1000          | Stressmarq      | Spc-401D   |
|                   | NCC           | Primary   | Rabbit  | 1:2000          | Millipore       | 3553       |
|                   | AQP2          | Primary   | Rabbit  | 1:1000          | Stressmarq      | 9398       |
|                   | Mouse HRP     | Secondary | Goat    | 1:3000          | Biorad          | L005680    |
|                   | Rabbit HRP    | Secondary | Goat    | 1:3000          | Biorad          | L005679    |

**Table S2.** Comparison of baseline characteristics in female and male kidney donors

| <b>Variable</b>                     | <b>Females<br/>(n = 12)</b> | <b>Males<br/>(n = 7)</b> | <b>P-value</b>    |
|-------------------------------------|-----------------------------|--------------------------|-------------------|
| Age, years                          | 61 ± 11                     | 52 ± 12                  | 0.1               |
| Body mass index, kg/m <sup>2</sup>  | 26 ± 7                      | 25 ± 2                   | 0.7               |
| eGFR, ml/min*                       | 89 ± 25                     | 99 ± 18                  | 0.4               |
| Creatinine clearance, ml/min        | 99 ± 33                     | 128 ± 7                  | 0.04              |
| Plasma sodium, mmol/L               | 143 ± 2                     | 142 ± 2                  | 0.4               |
| Plasma potassium, mmol/L            | 4.0 ± 0.3                   | 4.3 ± 0.3                | <b>0.05</b>       |
| <b>24h urine</b>                    |                             |                          |                   |
| Volume, mL                          | 2096 ± 671                  | 1581 ± 803               | 0.2               |
| Osmolality, mOsm/kg                 | 334 ± 130                   | 734 ± 216                | <b>&lt; 0.001</b> |
| Creatinine, mmol/day                | 9.0 ± 2.6                   | 17.1 ± 1.3               | <b>&lt; 0.001</b> |
| Sodium, mmol/day                    | 109 ± 33                    | 173 ± 44                 | <b>0.002</b>      |
| Potassium, mmol/day                 | 63 ± 23                     | 101 ± 39                 | <b>0.01</b>       |
| Protein, mg/day                     | 80 ± 21                     | 83 ± 18                  | 0.8               |
| <b>Spot urine</b>                   |                             |                          |                   |
| Protein to creatinine ratio, g/mmol | 10.5 ± 5.5                  | 7.1 ± 2.6                | 0.1               |

\* Estimated glomerular filtration rate (eGFR) adjusted for body surface area.

**Table S3.** Patient characteristics nephrostomy drain study

| # | Sex,<br>M/F | Age,<br>years | eGFR,<br>ml/min/1.73m <sup>2</sup> | Reason for<br>nephrostomy drain | Time drain<br>placed, days | Collection<br>time, min. |
|---|-------------|---------------|------------------------------------|---------------------------------|----------------------------|--------------------------|
| 1 | M           | 54            | 67                                 | Kidney stones                   | 1                          | 105                      |
| 2 | F           | 30            | 118                                | Abscess                         | 78                         | 105                      |
| 3 | M           | 62            | 58                                 | Colorectal cancer               | 27                         | 135                      |
| 4 | F           | 62            | 35                                 | Endograft                       | 14                         | 90                       |
| 5 | F           | 80            | 83                                 | Colorectal cancer               | 55                         | 120                      |
| 6 | M           | 86            | 22                                 | Colorectal cancer               | 47                         | 180                      |
| 7 | F           | 60            | 47                                 | Metastatic cancer               | 38                         | N/A                      |
| 8 | M           | 59            | 99                                 | Colorectal cancer               | 33                         | 105                      |
| 9 | F           | 36            | 53                                 | Kidney stones                   | 27                         | 90                       |

**Table S4.** Characteristics urine samples from nephrostomy drain and bladder

| <b>Variable</b>                | <b>Nephrostomy<br/>(n = 9)</b> | <b>Bladder<br/>(n = 9)</b> | <b>P-value</b> |
|--------------------------------|--------------------------------|----------------------------|----------------|
| Collection time, min*          | 116 ± 30                       | 116 ± 30                   | -              |
| Creatinine clearance, ml/min*  | 31 ± 21                        | 33 ± 18                    | 0.60           |
| Protein/creatinine, g/mmol     | 95 ± 56                        | 68 ± 71                    | 0.4            |
| Albumin/creatinine, mg/mmol    | 69 ± 40                        | 45 ± 52                    | 0.4            |
| Sodium excretion, μmol/min*    | 23 ± 10                        | 23 ± 14                    | 1.0            |
| Potassium excretion, μmol/min* | 11 ± 4                         | 13 ± 7                     | 0.4            |
| Diuresis, ml/min*              | 0.3 ± 0.2                      | 0.3 ± 0.1                  | 0.5            |

\* These data were available for 8 patients because collection time was not available in participant #7.

Figure S1: Bland-Altman

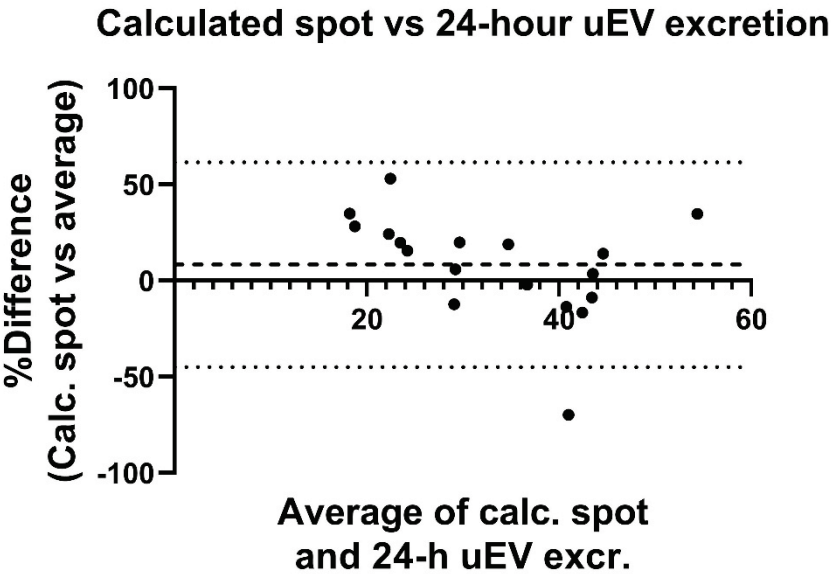

**Legend Figure S1:** Bland Altman analysis of calculated spot vs. 24-hour uEV excretion. The X-axis depicts the average of the two uEV excretion methods; on the Y-axis the percent difference of calculated spot excretion vs. the average of the uEV excretion methods is shown. Shown are Bias (---) and 95% Limits of agreement (....).
